# Supplementary material
Source: publisher figshare collection journal article supplement (https://sage.figshare.com/ndownloader/files/14652158)

Supplemental Figure 3:  
Responders of headache questionnaire by school type and gender

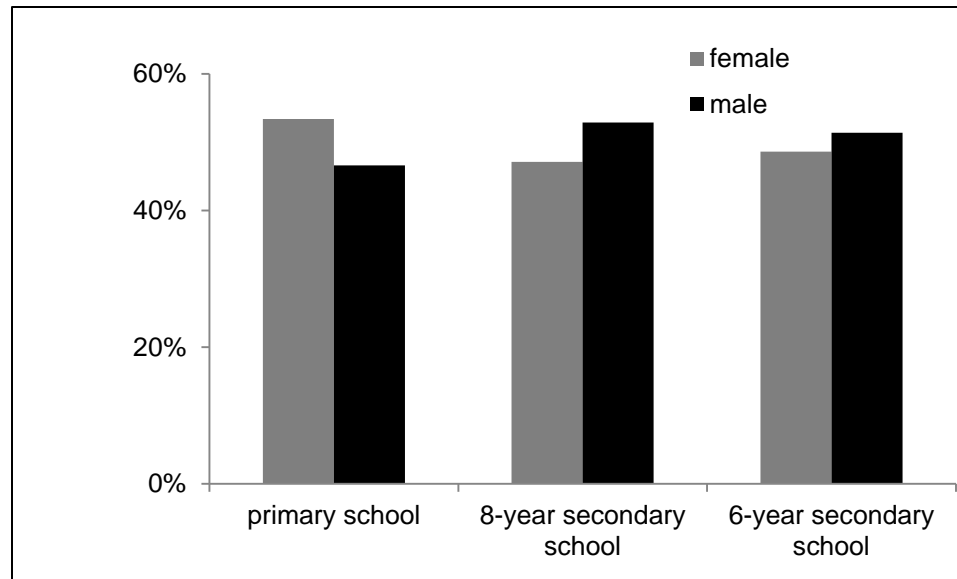

Supplement: Supplementary file 1 [file 14652158]
